# Supplementary material
Source: HighWire-hosted journal article supplement (https://ard.bmj.com/content/79/4/490)

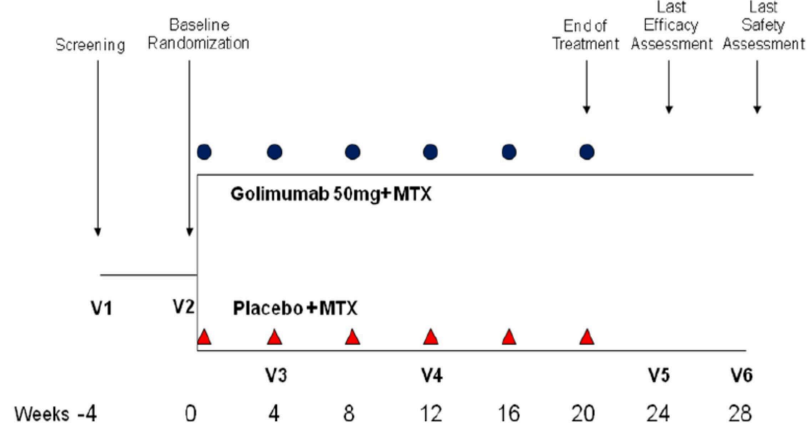

**Supplementary Figure 1** GO-DACT trial design

MTX: methotrexate; ; V: visit

Supplement: inline-supplementary-material-1 [file inline-supplementary-material-1.pdf]
